# Supplementary material for: Perineural Invasion and Postoperative Adjuvant Chemotherapy Efficacy in Patients With Gastric Cancer
Source: Front Oncol. 2020 Apr 21;10:530. doi: 10.3389/fonc.2020.00530 (PMC7186485; doi:10.3389/fonc.2020.00530)
Supplement: Table S1 — Perineural invasion data of gastric cancer samples from the Asian Cancer Research Group. [file Table_1.XLS]

## Sheet: Table S1
Tumor ID	PNI
GSM1523727	Negative
GSM1523728	Negative
GSM1523729	Negative
GSM1523748	Positive
GSM1523765	Positive
GSM1523768	Positive
GSM1523769	Positive
GSM1523771	Negative
GSM1523777	Negative
GSM1523778	Negative
GSM1523779	Negative
GSM1523780	Negative
GSM1523781	Positive
GSM1523782	Negative
GSM1523783	Negative
GSM1523784	Negative
GSM1523785	Negative
GSM1523786	Positive
GSM1523787	Negative
GSM1523789	Negative
GSM1523790	Negative
GSM1523791	Negative
GSM1523792	Negative
GSM1523793	Negative
GSM1523794	Negative
GSM1523795	Negative
GSM1523796	Negative
GSM1523797	Negative
GSM1523798	Positive
GSM1523799	Negative
GSM1523800	Negative
GSM1523801	Negative
GSM1523802	Negative
GSM1523803	Positive
GSM1523804	Positive
GSM1523805	Negative
GSM1523806	Positive
GSM1523807	Negative
GSM1523808	Negative
GSM1523809	Negative
GSM1523810	Negative
GSM1523811	Negative
GSM1523812	Negative
GSM1523813	Negative
GSM1523814	Negative
GSM1523815	Negative
GSM1523816	Positive
GSM1523817	Negative
GSM1523818	Negative
GSM1523819	Positive
GSM1523820	Positive
GSM1523821	Negative
GSM1523822	Negative
GSM1523823	Negative
GSM1523824	Negative
GSM1523825	Negative
GSM1523826	Positive
GSM1523827	Negative
GSM1523828	Negative
GSM1523829	Negative
GSM1523830	Negative
GSM1523831	Negative
GSM1523832	Positive
GSM1523833	Positive
GSM1523834	Positive
GSM1523835	Negative
GSM1523836	Negative
GSM1523837	Positive
GSM1523838	Negative
GSM1523839	Negative
GSM1523840	Negative
GSM1523841	Positive
GSM1523842	Positive
GSM1523843	Positive
GSM1523844	Positive
GSM1523845	Negative
GSM1523846	Negative
GSM1523847	Negative
GSM1523848	Negative
GSM1523849	Negative
GSM1523850	Positive
GSM1523851	Negative
GSM1523852	Positive
GSM1523853	Negative
GSM1523854	Negative
GSM1523855	Negative
GSM1523856	Negative
GSM1523857	Negative
GSM1523858	Positive
GSM1523859	Negative
GSM1523860	Negative
GSM1523861	Negative
GSM1523862	Positive
GSM1523863	Negative
GSM1523864	Negative
GSM1523865	Positive
GSM1523866	Positive
GSM1523867	Negative
GSM1523868	Positive
GSM1523869	Negative
GSM1523870	Negative
GSM1523871	Positive
GSM1523872	Positive
GSM1523873	Negative
GSM1523874	Positive
GSM1523875	Negative
GSM1523876	Positive
GSM1523877	Negative
GSM1523878	Negative
GSM1523879	Negative
GSM1523880	Negative
GSM1523881	Positive
GSM1523882	Positive
GSM1523883	Positive
GSM1523884	Positive
GSM1523885	Negative
GSM1523886	Positive
GSM1523887	Positive
GSM1523888	Negative
GSM1523889	Negative
GSM1523890	Positive
GSM1523891	Negative
GSM1523892	Positive
GSM1523893	Negative
GSM1523894	Positive
GSM1523895	Negative
GSM1523896	Positive
GSM1523897	Negative
GSM1523898	Negative
GSM1523899	Negative
GSM1523901	Negative
GSM1523903	Negative
GSM1523904	Positive
GSM1523905	Negative
GSM1523906	Negative
GSM1523908	Negative
GSM1523909	Positive
GSM1523910	Positive
GSM1523911	Positive
GSM1523918	Positive
GSM1523919	Positive
GSM1523920	Positive
GSM1523921	Negative
GSM1523922	Negative
GSM1523923	Negative
GSM1523924	Negative
GSM1523925	Negative
GSM1523926	Negative
GSM1523927	Positive
GSM1523928	Negative
GSM1523930	Negative
GSM1523931	Negative
GSM1523932	Negative
GSM1523933	Positive
GSM1523934	Negative
GSM1523935	Positive
GSM1523936	Positive
GSM1523937	Negative
GSM1523938	Positive
GSM1523939	Positive
GSM1523940	Positive
GSM1523941	Positive
GSM1523942	Negative
GSM1523944	Negative
GSM1523945	Positive
GSM1523946	Negative
GSM1523947	Negative
GSM1523948	Positive
GSM1523949	Positive
GSM1523950	Negative
GSM1523951	Negative
GSM1523955	Positive
GSM1523959	Positive
GSM1523961	Positive
GSM1523962	Positive
GSM1523965	Positive
GSM1523968	Positive
GSM1523972	Negative
GSM1523973	Negative
GSM1523974	Negative
GSM1523977	Negative
GSM1523978	Negative
GSM1523982	Positive
GSM1523986	Negative
GSM1523989	Negative
GSM1523990	Negative
GSM1523993	Negative
GSM1523994	Negative
GSM1523997	Negative
GSM1523998	Negative
GSM1524000	Negative
GSM1524004	Negative
GSM1524008	Positive
GSM1524009	Positive
GSM1524010	Negative
GSM1524011	Negative
GSM1524012	Positive
GSM1524013	Negative
GSM1524014	Positive
GSM1524015	Negative
GSM1524016	Negative
GSM1524017	Negative
GSM1524018	Positive
GSM1524019	Negative
GSM1524020	Negative
GSM1524021	Positive
GSM1524022	Positive
GSM1524023	Negative
GSM1524024	Positive
GSM1524025	Negative
GSM1524026	Positive
GSM1524027	Positive
GSM1524028	Negative
GSM1524029	Negative
GSM1524031	Positive
GSM1524032	Negative
GSM1524033	Negative
GSM1524034	Positive
GSM1524035	Negative
GSM1524036	Negative
GSM1524037	Positive
GSM1524038	Positive
GSM1524039	Negative
GSM1524040	Negative
GSM1524041	Negative
GSM1524042	Negative
GSM1524043	Negative
GSM1524044	Negative
GSM1524047	Negative
GSM1524048	Negative
GSM1524049	Negative
GSM1524050	Positive
GSM1524051	Negative
GSM1524052	Positive
GSM1524053	Positive
GSM1524054	Negative
GSM1524055	Negative
GSM1524056	Negative
GSM1524057	Negative
GSM1524059	Positive
GSM1524060	Negative
GSM1524061	Positive
GSM1524068	Negative
GSM1524069	Negative
GSM1524070	Negative
GSM1524071	Negative
GSM1524072	Positive

## Sheet: Table S2
Author	GSM1523727	GSM1523728	GSM1523729	GSM1523748	GSM1523765	GSM1523768	GSM1523769	GSM1523771	GSM1523777	GSM1523778	GSM1523779	GSM1523780	GSM1523781	GSM1523782	GSM1523783	GSM1523784	GSM1523785	GSM1523786	GSM1523787	GSM1523789	GSM1523790	GSM1523791	GSM1523792	GSM1523793	GSM1523794	GSM1523795	GSM1523796	GSM1523797	GSM1523798	GSM1523799	GSM1523800	GSM1523801	GSM1523802	GSM1523803	GSM1523804	GSM1523805	GSM1523806	GSM1523807	GSM1523808	GSM1523809	GSM1523810	GSM1523811	GSM1523812	GSM1523813	GSM1523814	GSM1523815	GSM1523816	GSM1523817	GSM1523818
Buffa	-0.269711	2.90149	-0.716145	-3.24152	1.76073	5.98799	-1.12562	-3.81118	1.57801	-1.19661	-0.355003	4.48825	0.663998	4.9488	-2.66152	-3.67043	3.47767	-2.85994	2.68886	-2.8039	5.43188	4.40346	3.96451	-1.0431	5.19467	1.24789	-1.6101	3.53054	-3.4725	3.01343	1.11369	3.14964	1.46652	1.31389	-2.94204	-0.557636	-2.38387	2.11542	-0.461271	2.6531	1.68979	0.930931	-1.24944	4.02802	1.75435	-0.221978	0.439221	-2.18617	-1.64564
Jonsson	-0.746782	-0.299284	-2.41065	-1.73333	0.266098	1.6316	-1.88165	-1.17479	1.79575	0.798162	1.13628	1.29789	0.574011	0.926752	-1.9362	-0.730072	-0.303255	-1.50768	-1.39512	-0.0768246	1.19183	0.891709	2.27855	1.39494	3.16613	-1.26722	-0.594284	0.21895	-1.52169	1.52245	1.82725	-0.977515	-0.383458	0.0750787	-1.55209	-0.329878	-0.904901	0.127996	-1.66456	3.21017	-0.249084	1.01249	-1.05498	1.19954	0.461817	1.22525	0.937385	-0.343543	-2.20586
Ragnum	0.34776	1.99986	-3.60513	-3.03352	0.632614	4.20055	-0.634169	-2.5535	0.845347	0.978225	-1.50545	0.641385	-0.382352	2.25988	-0.371673	-0.870908	3.19259	-0.902864	0.655486	-1.4295	4.60974	1.948	2.1953	1.72298	3.42813	1.30144	0.662916	3.60632	-1.82734	3.12562	-2.04729	-0.270154	0.757986	-1.42105	0.3731	1.50297	1.38324	0.0489329	-0.800976	0.243276	0.840784	1.4185	0.0880533	0.769129	1.73604	-3.57688	-0.427037	-3.71669	-1.96645
Winter	0.334322	2.81223	1.30437	-1.61035	1.19235	3.56211	-0.650007	-3.05753	2.49732	-0.888815	-1.30303	4.50067	-0.537057	4.15103	-2.73057	-2.55698	3.38073	-3.68743	2.03275	-1.89238	3.59233	1.8331	3.05074	-3.20888	7.0657	1.09149	-0.808122	2.9674	-5.73491	2.0001	-0.806693	-0.218497	-0.512939	-1.11197	-2.44502	-0.659712	-1.92331	0.928955	-0.0285927	1.71007	0.301883	-0.122194	-3.31609	3.87924	-1.00667	-0.361942	2.72833	-1.09661	-2.16259
Yang	-3.87643	2.74896	-0.426617	-0.36871	-3.19179	5.49752	1.65933	6.54698	-2.42622	3.76875	-3.30308	3.22377	-1.70691	1.27902	-0.0731262	0.0783703	2.51385	0.486606	-3.7789	0.53503	3.34191	1.73869	-3.68154	-2.44767	3.37843	0.590513	5.97511	0.346548	-0.10599	-0.276772	-4.06657	-4.4404	-2.79991	-2.62296	1.2174	2.28567	-1.48321	0.604537	6.2026	-3.41914	0.774845	-0.614177	1.65672	3.09311	-4.60412	0.942711	-2.73551	-1.33684	-4.68062
[truncated: 198 more columns]

## Sheet: Table S3
	GSM1523727	GSM1523728	GSM1523729	GSM1523748	GSM1523765	GSM1523768	GSM1523769	GSM1523771	GSM1523777	GSM1523778	GSM1523779	GSM1523780	GSM1523781	GSM1523782	GSM1523783	GSM1523784	GSM1523785	GSM1523786	GSM1523787	GSM1523789	GSM1523790	GSM1523791	GSM1523792	GSM1523793	GSM1523794	GSM1523795	GSM1523796	GSM1523797	GSM1523798	GSM1523799	GSM1523800	GSM1523801	GSM1523802	GSM1523803	GSM1523804	GSM1523805	GSM1523806	GSM1523807	GSM1523808	GSM1523809	GSM1523810	GSM1523811	GSM1523812	GSM1523813	GSM1523814	GSM1523815	GSM1523816	GSM1523817	GSM1523818
Antifolate resistance	-1.4722	0.419509	0.341382	-0.450507	-1.30478	1.6	-1.67141	-2.08261	2.51554	0.328777	-1.19489	-1.90058	-0.442611	1.80542	-1.931	-1.43698	-2.43514	-0.793977	1.16486	-2.11442	1.02209	-0.784985	1.18918	-1.04573	2.37343	2.95553	-0.284833	-0.400645	1.14849	2.51611	0.453334	-0.632581	0.951624	2.44593	0.0526536	0.976461	-0.635232	1.11138	1.55714	-0.209434	1.0655	1.83491	1.13703	0.990045	2.13408	-1.04733	1.06073	-0.776295	0.0687015
One carbon pool by folate	0.692988	0.254629	1.91934	-0.454839	0.695241	-1.48581	-1.37088	-2.09548	0.901045	-1.44648	1.89944	1.25679	1.75275	2.75266	-1.96241	-1.14276	0.589933	-0.656716	1.21786	-1.69352	-0.218016	0.809068	3.26951	-1.55132	0.964893	0.611096	-2.05217	0.979722	-0.915364	1.22725	1.5622	1.24837	1.25278	1.03053	-0.757784	-0.317203	-0.771812	-1.20378	-0.0424876	1.09674	1.63507	1.51255	0.471444	1.26182	1.04904	0.723653	1.61827	0.458236	0.142003
Pyrimidine metabolism	1.29815	1.15548	1.41522	0.178077	0.808099	-0.289123	-2.00653	-2.8992	0.11181	-1.66315	1.54553	4.57684	-0.822273	3.23973	-3.25313	-2.58839	-1.103	-2.42282	3.42606	-2.29091	2.4596	2.64127	4.3127	-1.05298	2.41158	0.529936	-2.80659	1.52074	-1.76691	0.670983	3.03958	3.77728	1.56953	2.61973	-1.9294	0.0328683	-0.910094	-0.647848	-0.658343	2.13603	2.43927	2.1377	1.02508	2.40764	1.58597	1.28916	3.34806	-0.967819	0.870141
TYMS mRNA expression	10.0883	11.0432	10.51	9.73697	10.4794	9.91851	9.95215	9.41385	10.0474	9.95635	10.4442	11.5949	11.4754	11.1726	9.16812	10.0293	10.093	9.55119	10.2201	9.54613	11.0517	11.2121	11.1251	10.129	11.2732	10.4561	10.2695	10.7869	10.4989	11.5713	11.4799	11.8343	9.94938	10.984	10.0534	11.5703	10.3083	10.1214	10.3562	11.0905	11.4421	11.4692	10.939	11.7254	11.3386	10.7526	10.8214	9.66628	10.0802
[truncated: 198 more columns]
